# Supplementary material for: Excimer–monomer switch: a reaction-based approach for selective detection of fluoride
Source: Royal Society of Chemistry journal article supplement (doi:10.1039/c4an00522h), 2014-01-01

## Supplementary Data

### Excimer-monomer Switch: A Reaction-Based Approach for Selective Detection of Fluoride

Qiao Song, Angela Bamesberger, Lingyun Yang, Haley Houtwed, Haishi Cao\*

Department of Chemistry, University of Nebraska at Kearney, Kearney NE 68849, USA

#### Contents:

|                                                                                                        |     |
|--------------------------------------------------------------------------------------------------------|-----|
| Figure S1: The absorption spectra of ES-1, ES-2 and ES-3 in different solvents.....                    | S2  |
| Figure S2: The emission spectra of ES-1, ES-2 and ES-3 in different solvents.....                      | S3  |
| Figure S3: The absorption spectra of ES-1, ES-2 and ES-3 in the presence of F <sup>-</sup> (TBAF)..... | S4  |
| NMR Spectra ( <sup>1</sup> H and <sup>13</sup> C) of ES-1, ES-2, and ES-3.....                         | S5  |
| High resolution mass spectrometry of ES-1, ES-2, and ES-3 .....                                        | S13 |

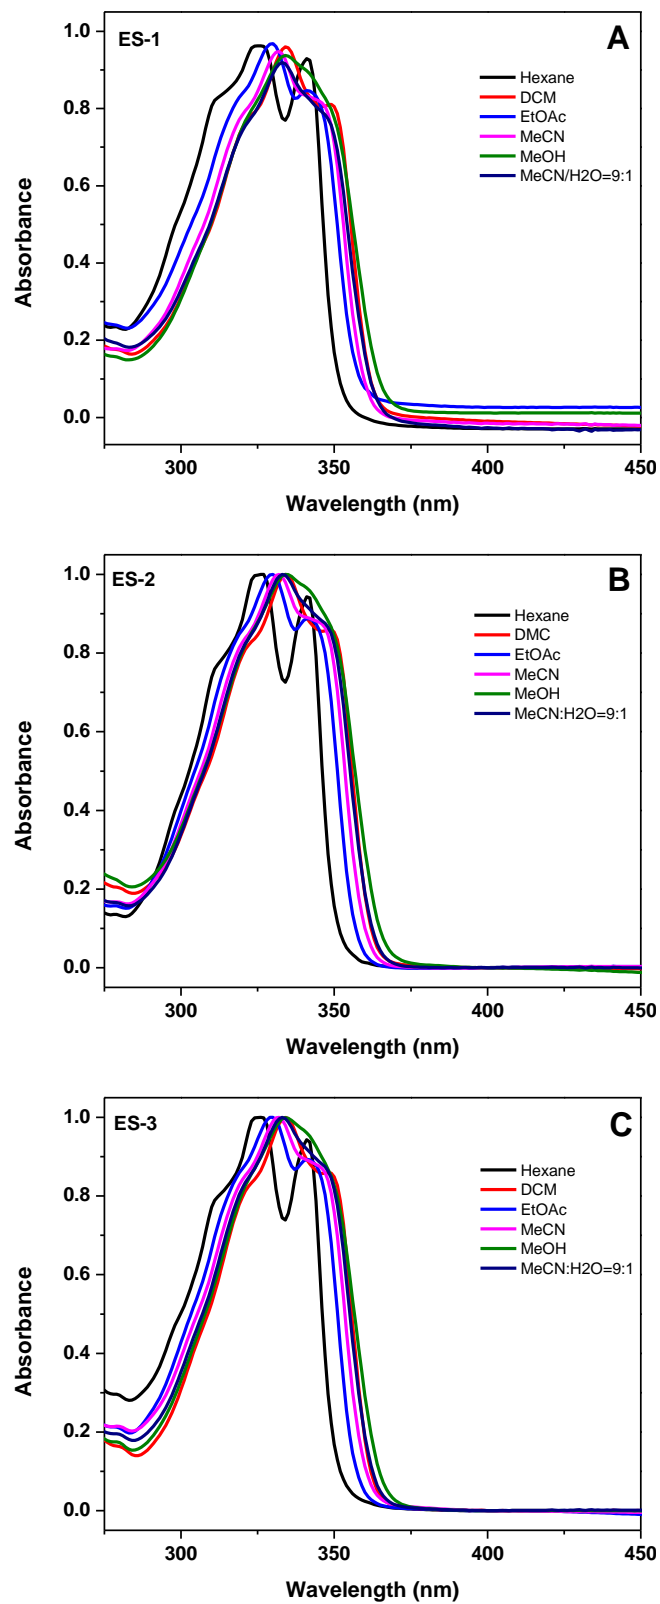

**Figure S1:** The absorption spectra of ES-1, ES-2 and ES-3 in exane, dichloromathane (DCM), ethyl acetate (EtOAc), acetonitrile (MeCN), methanol (MeOH), and acetonitrile/H<sub>2</sub>O (9:1).

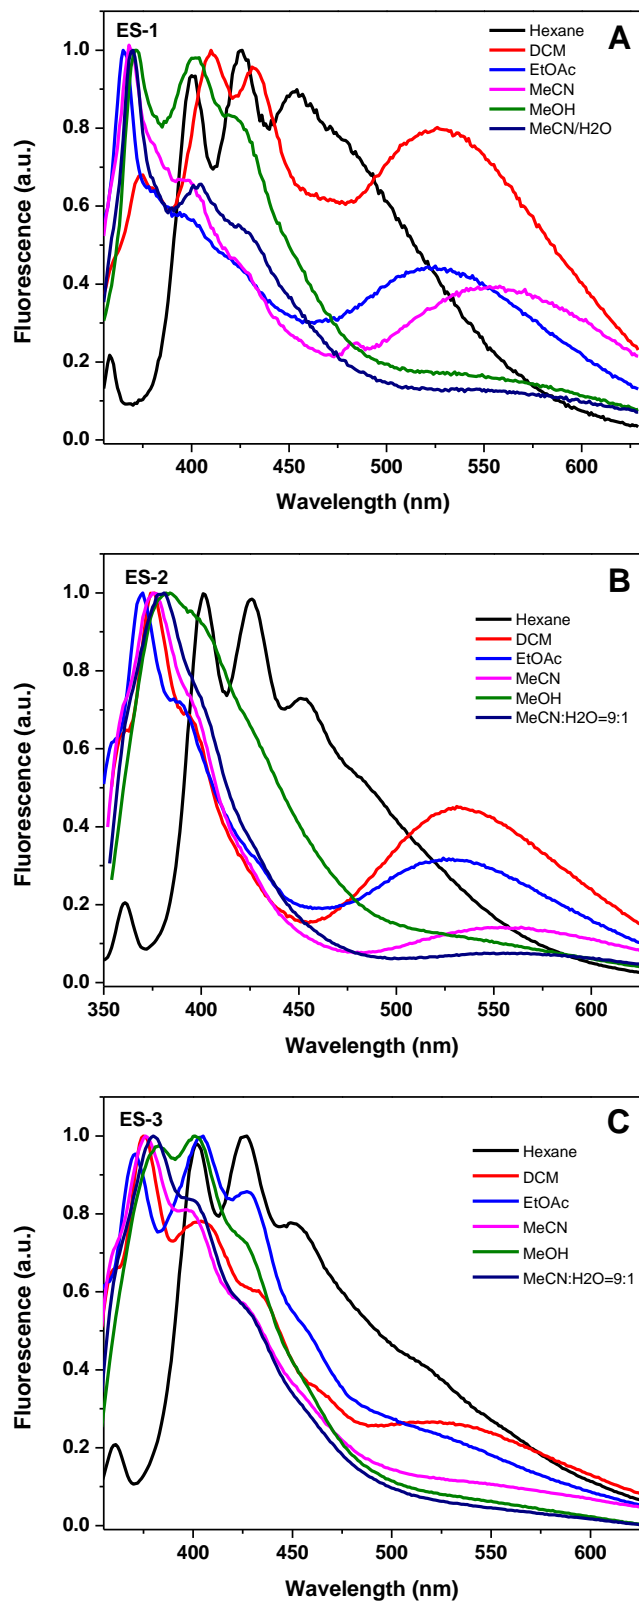

**Figure S2:** The emission spectra of ES-1, ES-2 and ES-3 in hexane, dichloromethane (DCM), ethyl acetate (EtOAc), acetonitrile (MeCN), methanol (MeOH), and acetonitrile/H<sub>2</sub>O (9:1).

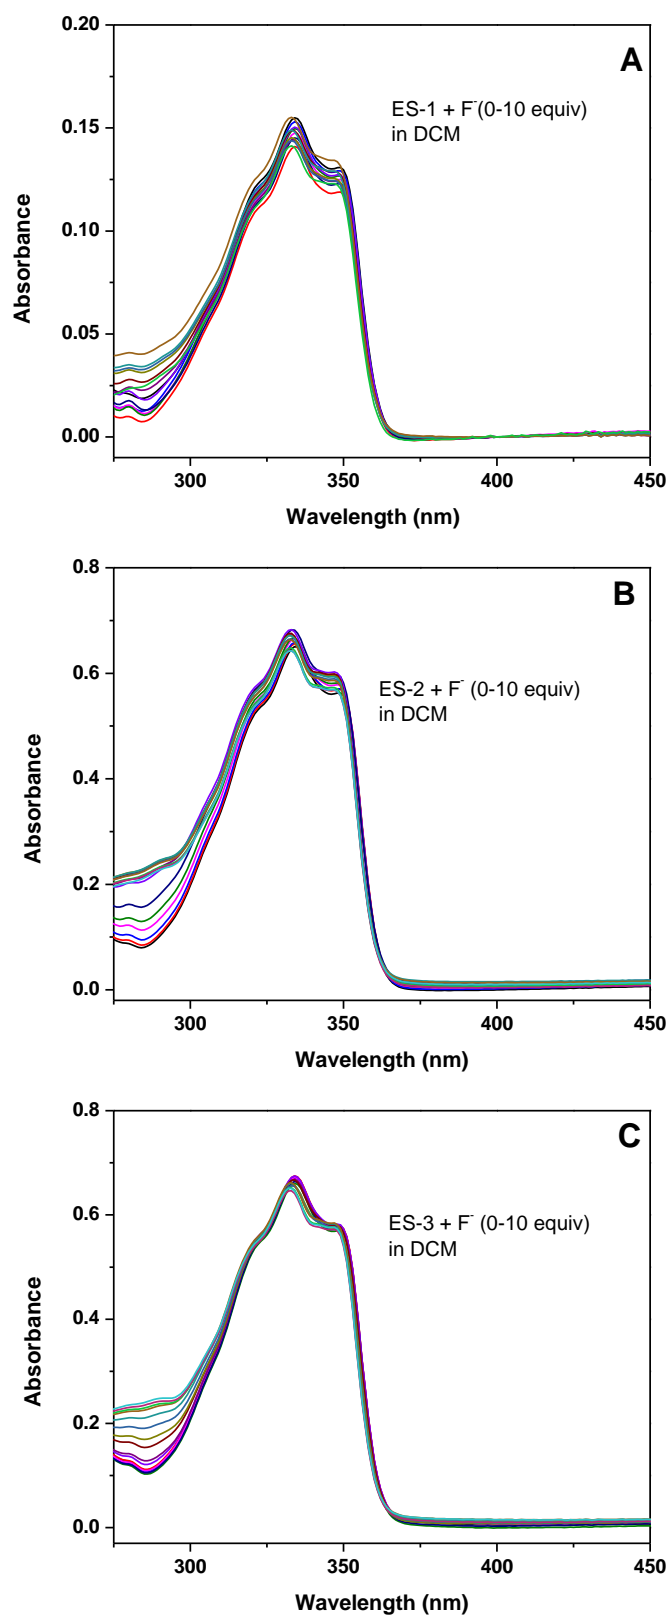

**Figure S3:** The absorption spectra of ES-1, ES-2 and ES-3 ( $5.0 \times 10^{-5}$  M) did not show significant change in the presence of 0-10 equiv F<sup>-</sup> (TBAF) in the DCM.

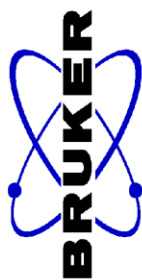

Current Data Parameters  
NAME 07-29-13  
EXPNO 1  
PROCNO 1

F2 - Acquisition Parameters

Date\_ 20130729  
Time 15.45  
INSTRUM spect  
PROBHD 5 mm BBO BB-1H  
PULPROG zg30  
TD 65536  
SOLVENT CDCl3  
NS 16  
DS 2  
SWH 6172.839 Hz  
FIDRES 0.094190 Hz  
AQ 5.3084660 sec  
RG 512  
DW 81.000 usec  
DE 6.00 usec  
TE 296.6 K  
D1 1.00000000 sec  
TD0 1

==== CHANNEL f1 =====  
NUC1 1H  
P1 10.00 usec  
PL1 -1.50 dB  
SF01 300.1318534 MHz

F2 - Processing parameters  
SI 32768  
SF 300.1300000 MHz  
WDW EM  
SSB 0  
LB 0.30 Hz  
GB 0  
PC 1.00

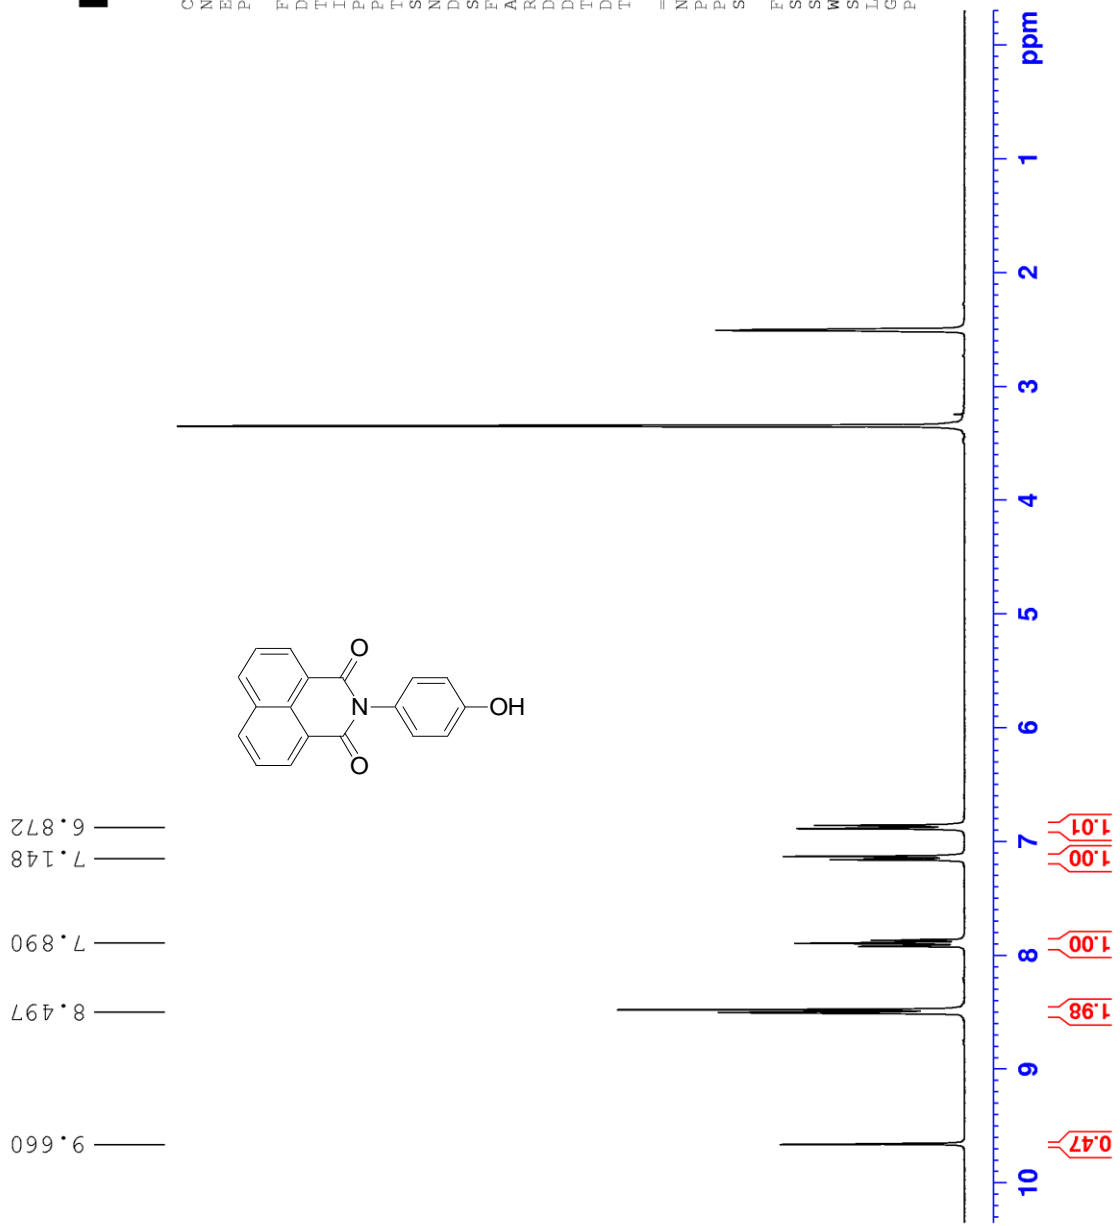

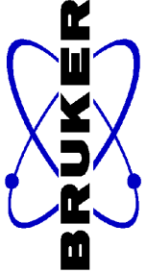

Current Data Parameters  
NAME 07-29-13  
EXPNO 10  
PROCNO 1

F2 - Acquisition Parameters  
Date\_ 20130729  
Time 16.24  
INSTRUM spect  
PROBHD 5 mm BBO BB-1H  
PULPROG zgpg30  
ID 65536  
SOLVENT CDCl3  
NS 300  
DS 4  
SWH 17985.611 Hz  
FIDRES 0.274439 Hz  
AQ 1.8219508 sec  
RG 3251  
DW 27.800 usec  
DE 6.00 usec  
TE 297.1 K  
D1 2.00000000 sec  
d11 0.03000000 sec  
DELTA 1.89999998 sec  
TD0 1

==== CHANNEL f1 =====  
NUC1 13C  
P1 8.50 usec  
PL1 -2.00 dB  
SFO1 75.4752953 MHz

==== CHANNEL f2 =====  
CPDPRG2 waltz16  
NUC2 1H  
PCPD2 100.00 usec  
PL2 -1.50 dB  
PL12 18.50 dB  
PL13 20.00 dB  
SFO2 300.1312005 MHz

F2 - Processing parameters  
SI 32768  
SF 75.4677490 MHz  
WDW EM  
SSB 0  
LB 1.00 Hz  
GB 0  
PC 1.00

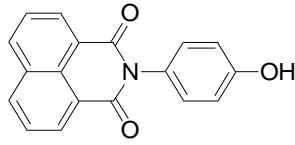

164.31  
157.60  
134.83  
131.87  
131.17  
130.40  
128.24  
127.67  
127.37  
123.11  
115.92

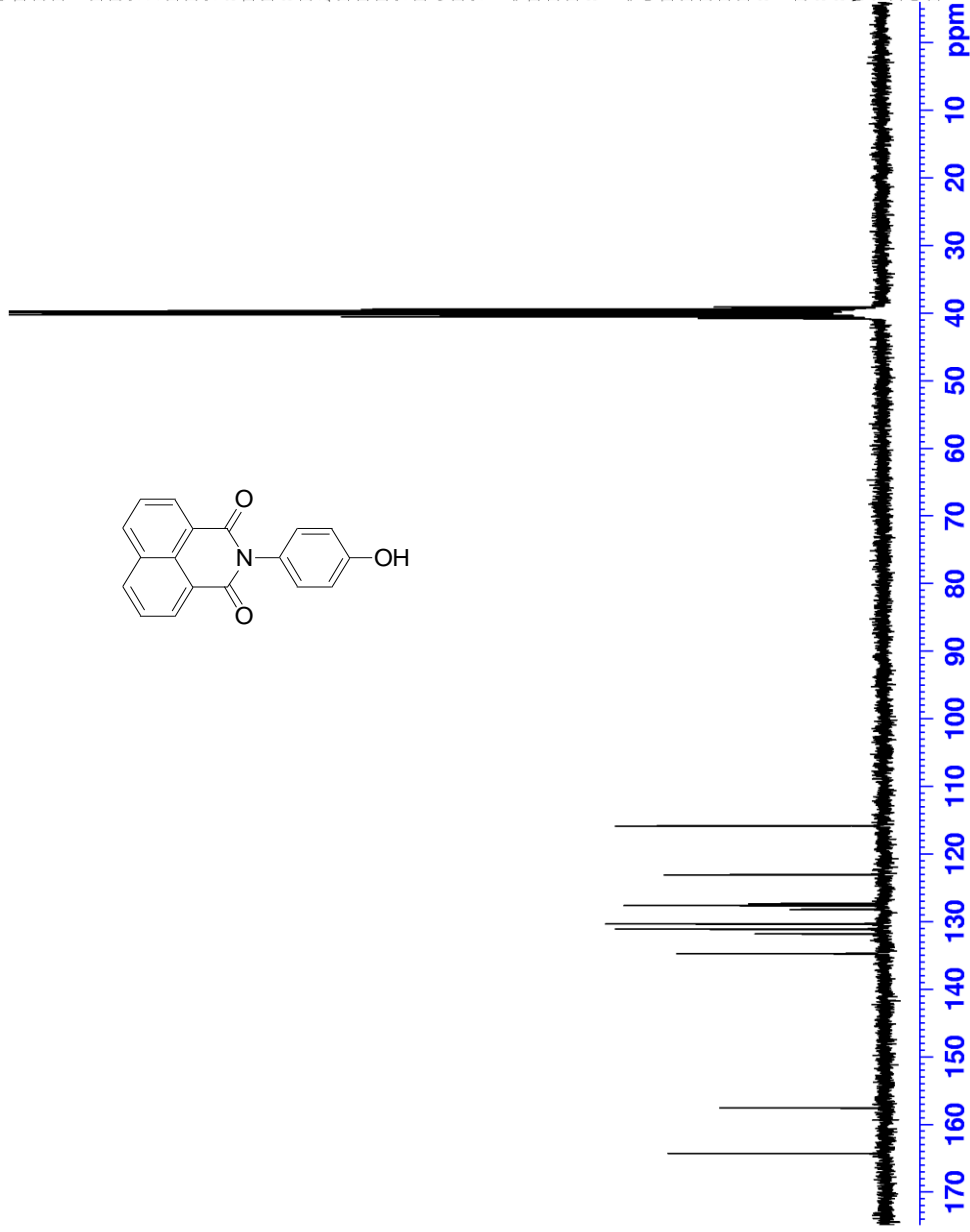

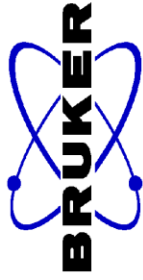

Current Data Parameters  
NAME 7-31-2013  
EXPNO 1  
PROCNO 1

F2 - Acquisition Parameters  
Date\_ 20130731  
Time\_ 15.34  
INSTRUM spect  
PROBHD 5 mm BBO BB-1H  
PULPROG zg30  
TD 65536  
SOLVENT CDCl3  
NS 16  
DS 2  
SWH 6172.839 Hz  
FIDRES 0.094190 Hz  
AQ 5.3084660 sec  
RG 406.4  
DW 81.000 usec  
DE 6.00 usec  
TE 296.5 K  
D1 1.00000000 sec  
TD0 1

==== CHANNEL f1 =====  
NUC1 1H  
P1 10.00 usec  
PL1 -1.50 dB  
SFO1 300.1318534 MHz

F2 - Processing parameters  
SI 32768  
SF 300.1300000 MHz  
WDW EM  
SSB 0  
LB 0.30 Hz  
GB 0  
PC 1.00

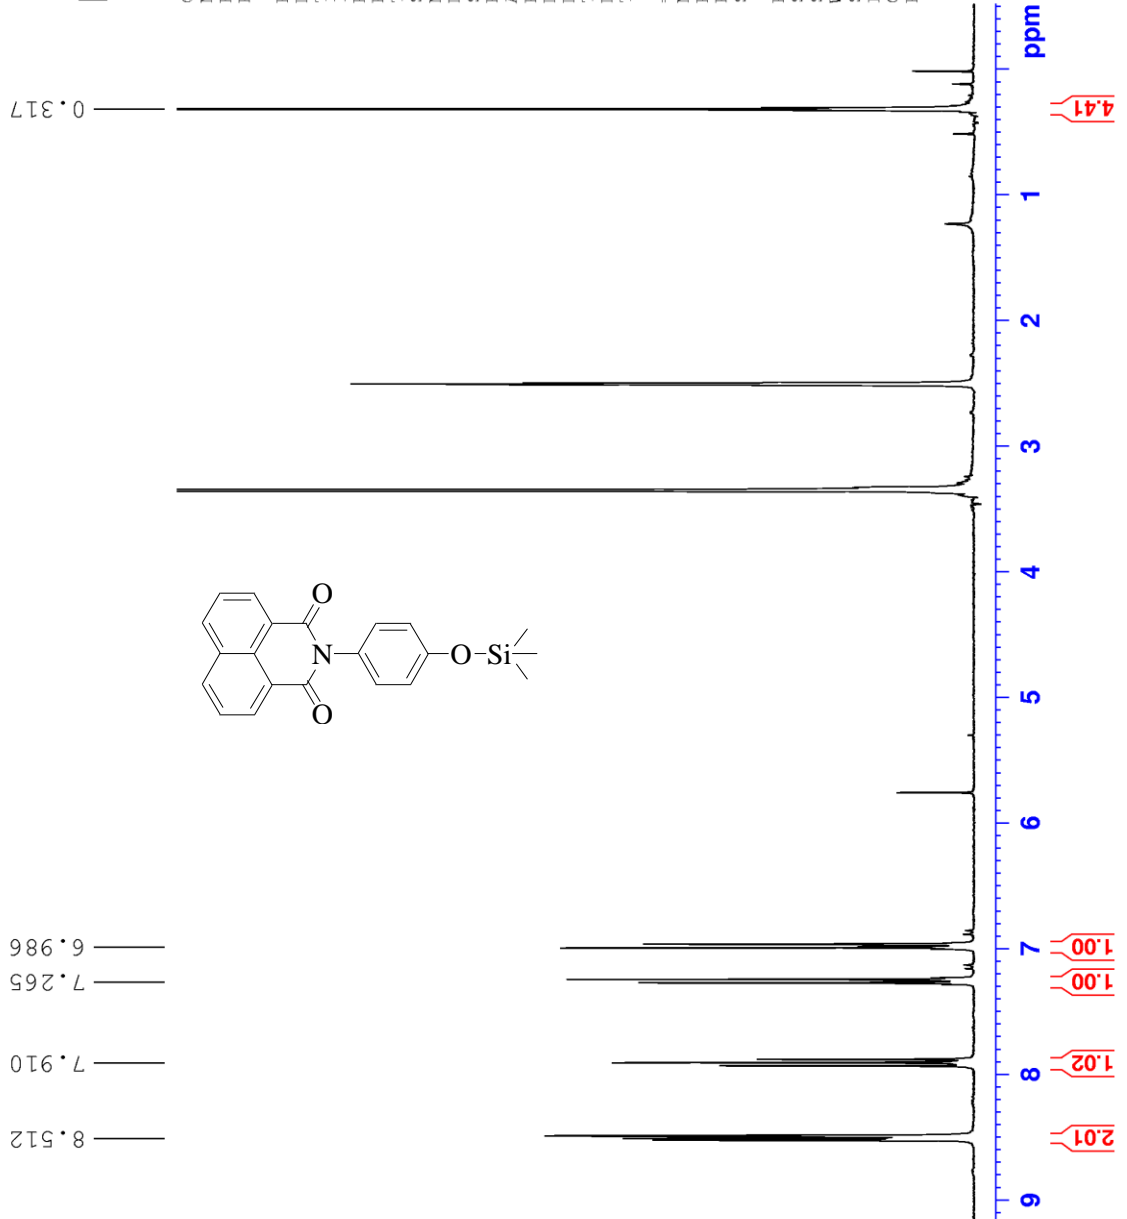

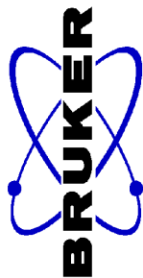

Current Data Parameters  
NAME 08-08-2013  
EXPNO 10  
PROCNO 1

F2 - Acquisition Parameters  
Date\_ 20130808  
Time\_ 14.45  
INSTRUM spect  
PROBHD 5 mm BBO BB-LH  
PULPROG zgpg30  
TD 65536  
SOLVENT CDCl3  
NS 1200  
DS 4  
SWH 17985.611 Hz  
FIDRES 0.274439 Hz  
AQ 1.8219508 sec  
RG 8192  
DW 27.800 usec  
DE 6.00 usec  
TE 294.8 K  
D1 2.00000000 sec  
d11 0.03000000 sec  
DELTA 1.89999998 sec  
TD0 1

==== CHANNEL f1 =====  
NUC1 13C  
P1 8.50 usec  
PL1 -2.00 dB  
SFO1 75.4752953 MHz  
  
==== CHANNEL f2 =====  
CPDPRG2 waltz16  
NUC2 1H  
PCPD2 100.00 usec  
PL2 -1.50 dB  
PL12 18.50 dB  
PL13 20.00 dB  
SFO2 300.1312005 MHz

F2 - Processing parameters  
SI 32768  
SF 75.4677490 MHz  
EM  
WDW 0  
SSB 0  
LB 1.00 Hz  
GB 0  
PC 1.00

0.68

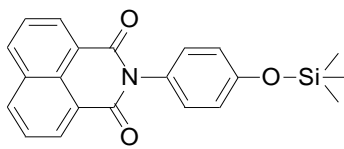

164.40  
154.93  
134.88  
131.96  
131.18  
130.70  
129.68  
128.33  
127.78  
123.12  
120.20

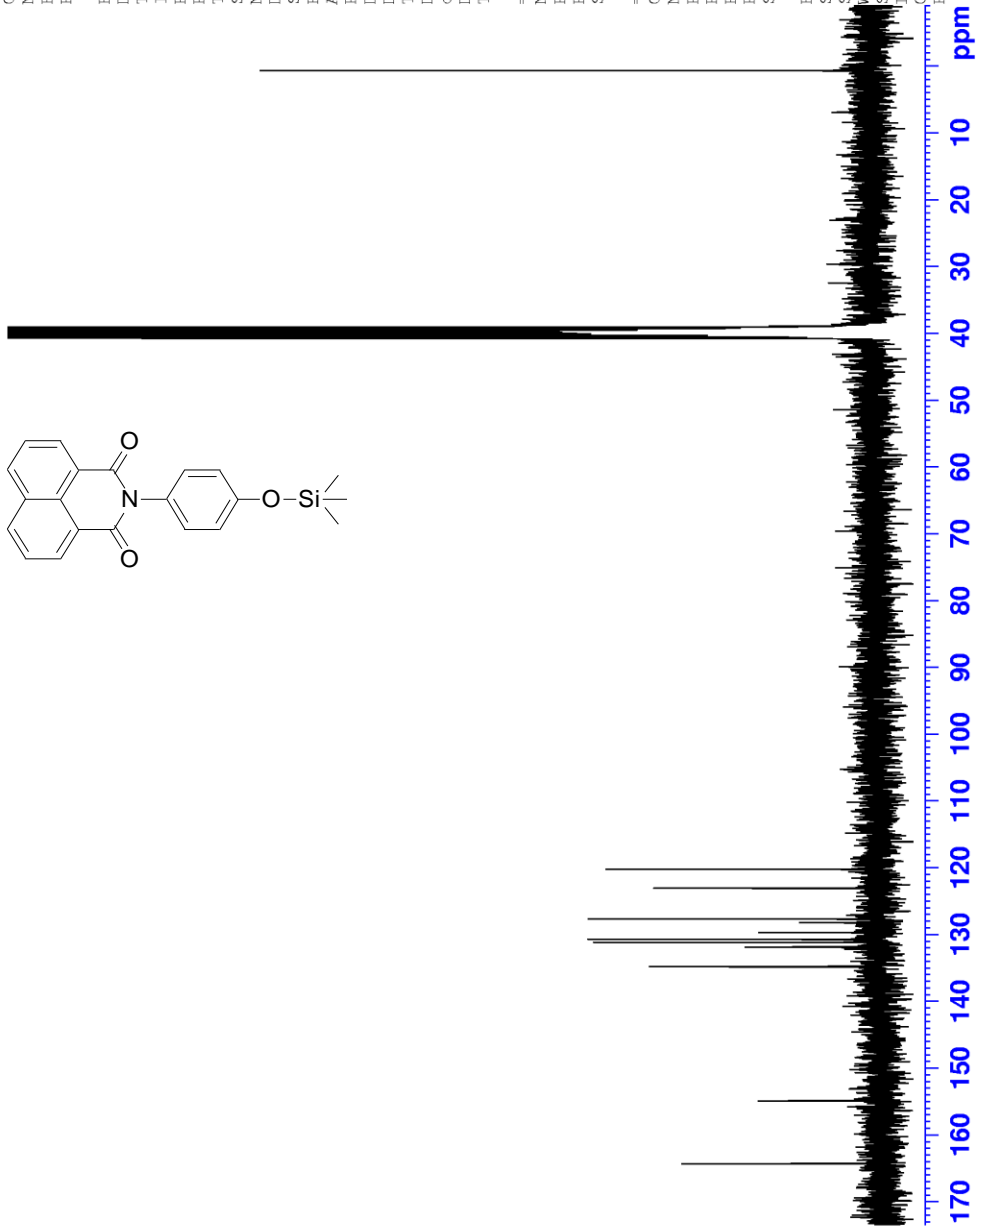



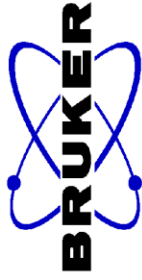

Current Data Parameters  
NAME 08-07~2013  
EXPNO 4  
PROCNO 1

F2 - Acquisition Parameters  
Date\_ 20130807  
Time 16.18  
INSTRUM spect  
PROBHD 5 mm BBO BB-1H  
PULPROG zg30  
TD 65536  
SOLVENT CDCl3  
NS 16  
DS 2  
SWH 6172.839 Hz  
FIDRES 0.094190 Hz  
AQ 5.3084660 sec  
RG 287.4  
DW 81.000 usec  
DE 6.00 usec  
TE 294.5 K  
D1 1.00000000 sec  
TDO 1

==== CHANNEL f1 =====  
NUC1 1H  
P1 10.00 usec  
PL1 -1.50 dB  
SF01 300.1318534 MHz

F2 - Processing parameters  
SI 32768  
SF 300.1300000 MHz  
WDW EM  
SSB 0  
LB 0.30 Hz  
GB 0  
PC 1.00

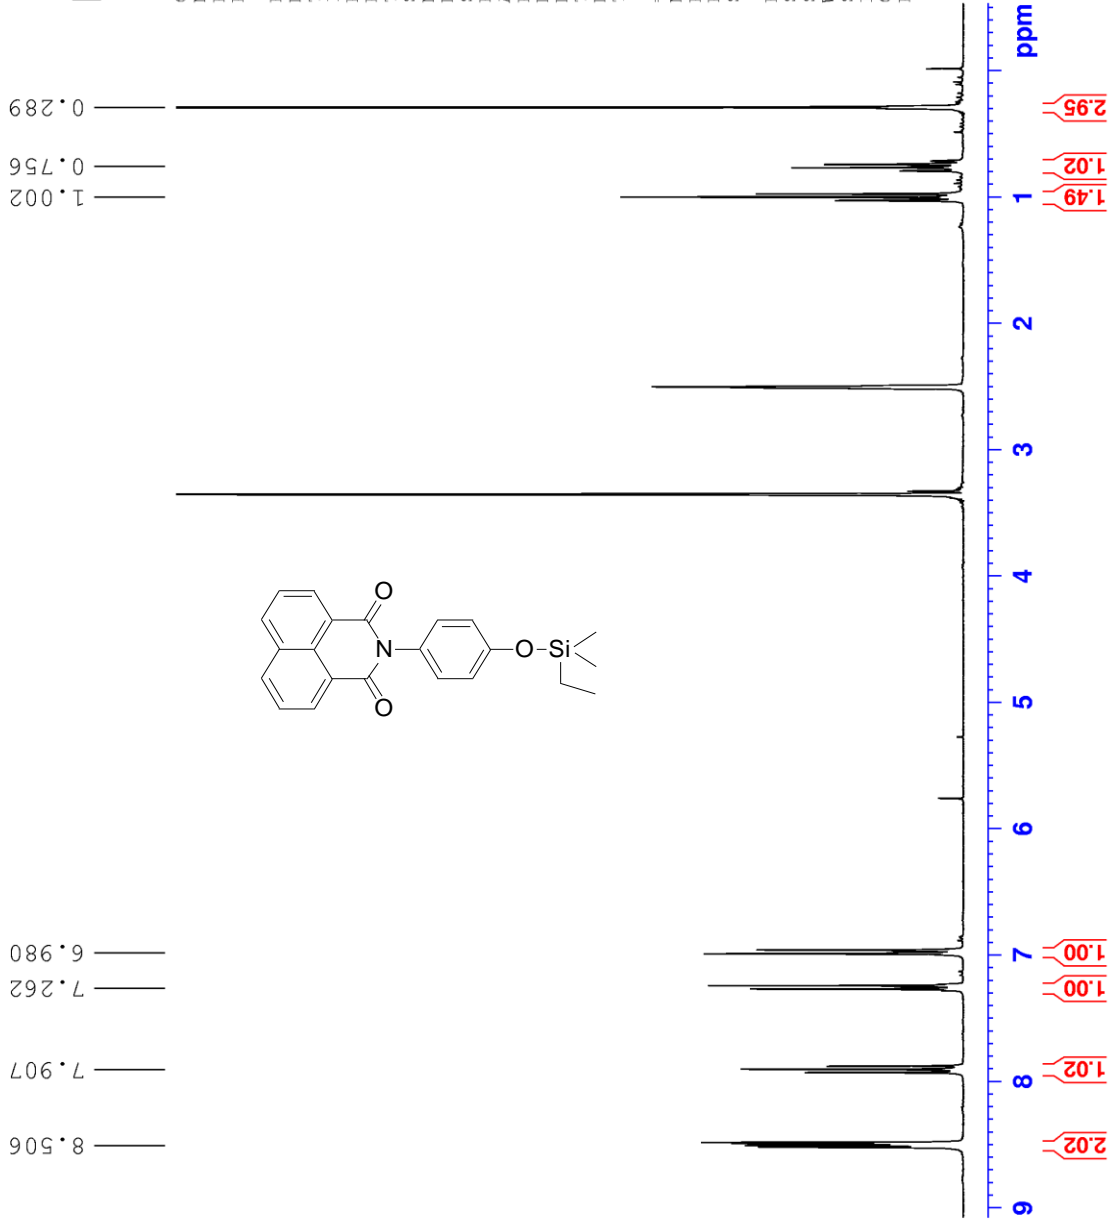

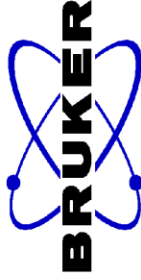

Current Data Parameters  
NAME 08-07-2013  
EXPNO 10  
PROCNO 1

F2 - Acquisition Parameters  
Date\_ 20130807  
Time 16.54  
INSTRUM spect  
PROBHD 5 mm BBO BB-1H  
PULPROG zgpg30  
TD 65536  
SOLVENT CDCl3  
NS 300  
DS 4  
SWH 17985.611 Hz  
FIDRES 0.274439 Hz  
AQ 1.8219508 sec  
RG 9195.2  
DE 27.800 usec  
TE 295.0 K  
D1 2.00000000 sec  
d11 0.03000000 sec  
DELTA 1.89999998 sec  
TD0 1

==== CHANNEL f1 =====  
NUC1 13C  
P1 8.50 usec  
PL1 -2.00 dB  
SFO1 75.4752953 MHz  
  
==== CHANNEL f2 =====  
CPDPRG2 waltz16  
NUC2 1H  
PCPD2 100.00 usec  
PL2 -1.50 dB  
PL12 18.50 dB  
PL13 20.00 dB  
SFO2 300.1312005 MHz  
  
F2 - Processing parameters  
SI 32768  
SF 75.4674634 MHz  
WDW EM  
SSB 0  
LB 1.00 Hz  
GB 0  
PC 1.40

12.11  
10.78  
2.36

168.01  
158.80  
138.58  
135.63  
134.91  
134.51  
133.45  
131.99  
131.43  
126.79  
123.99

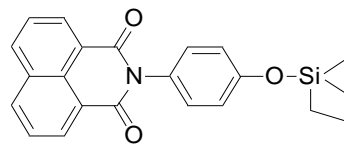

170 160 150 140 130 120 110 100 90 80 70 60 50 40 30 20 10 ppm

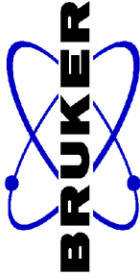

Current Data Parameters  
NAME 08-08-2013  
EXPNO 2  
PROCNO 1

F2 - Acquisition Parameters  
Date\_ 20130808  
Time 16.12  
INSTRUM spect  
PROBHD 5 mm BBO BB-1H  
PULPROG zg30  
TD 65536  
SOLVENT CDCl3  
NS 16  
DS 2  
SWH 6172.839 Hz  
FIDRES 0.094190 Hz  
AQ 5.3084660 sec  
RG 322.5  
DW 81.000 usec  
DE 6.00 usec  
TE 294.5 K  
D1 1.00000000 sec  
TD0 1

==== CHANNEL f1 =====  
NUC1 1H  
P1 10.00 usec  
PL1 -1.50 dB  
SF01 300.1318534 MHz

F2 - Processing parameters  
SI 32768  
SF 300.1300000 MHz  
WDW EM  
SSB 0  
LB 0.30 Hz  
GB 0  
PC 1.40

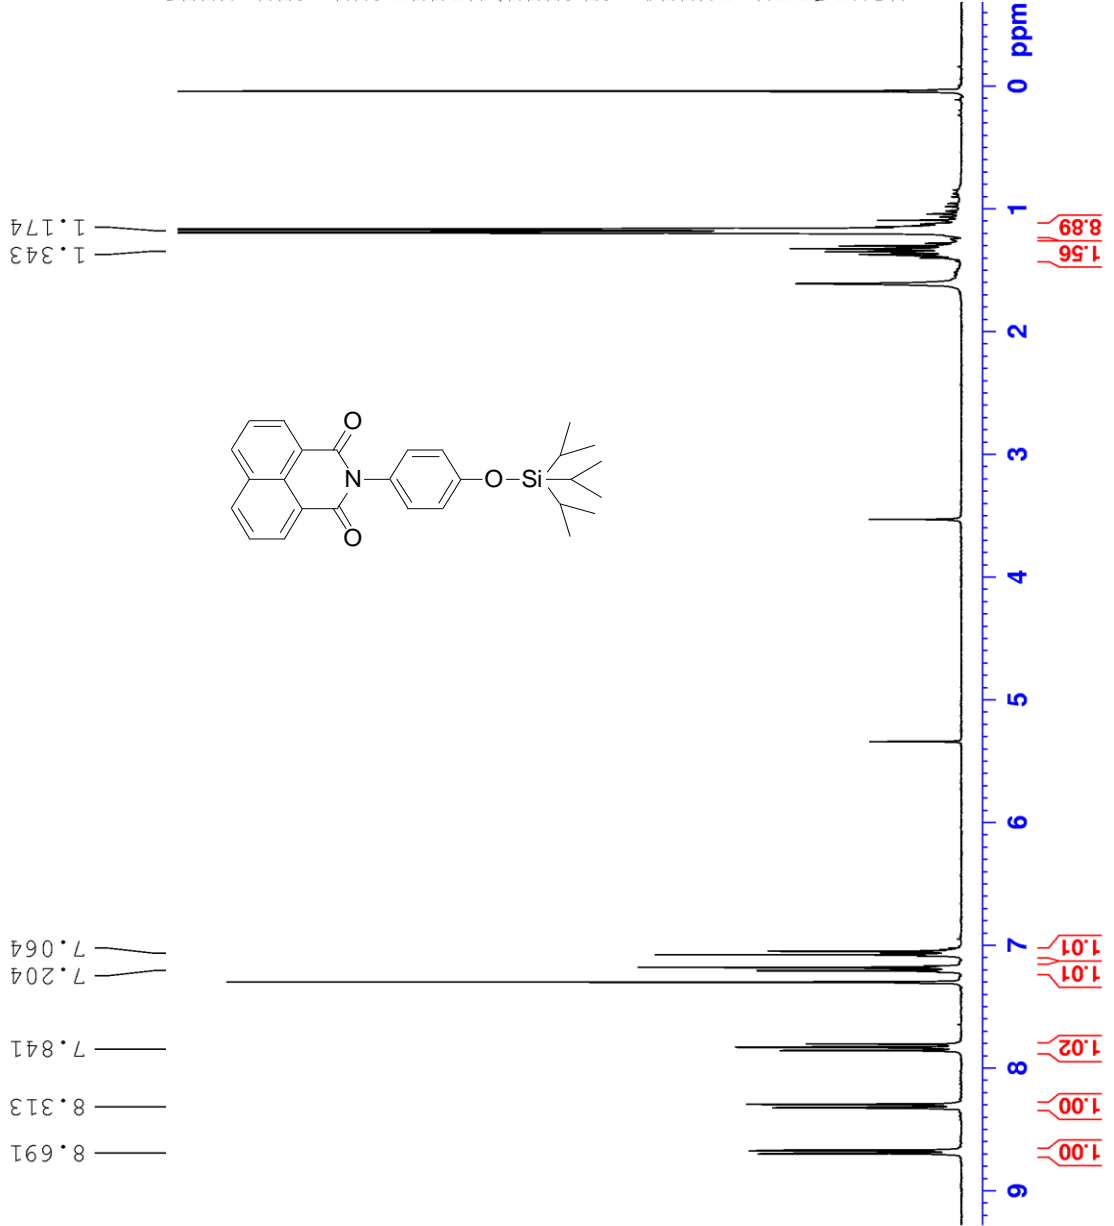

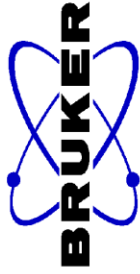

Current Data Parameters  
NAME 08-08-2013  
EXPNO 20  
PROCNO 1

F2 - Acquisition Parameters  
Date\_ 20130808  
Time\_ 17.02  
INSTRUM spect  
PROBHD 5 mm BBO BB-1H  
PULPROG zgpg30  
TD 65536  
SOLVENT CDCl3  
NS 330  
DS 4  
SWH 17985.611 Hz  
FIDRES 0.277439 Hz  
AQ 1.8219508 sec  
RG 5160.6  
DW 27.800 usec  
DE 6.00 usec  
TE 295.0 K  
D1 2.00000000 sec  
d11 0.03000000 sec  
DELTA 1.89999998 sec  
TD0 1

==== CHANNEL f1 =====  
NUC1 13C  
P1 8.50 usec  
PL1 -2.00 dB  
SFO1 75.4752953 MHz

==== CHANNEL f2 =====  
CPDPRG2 waltz16  
NUC2 1H  
PCPD2 100.00 usec  
PL2 -1.50 dB  
PL12 18.50 dB  
PL13 20.00 dB  
SFO2 300.1312005 MHz

F2 - Processing parameters  
SI 32768  
SF 75.4677490 MHz  
WDW EM  
SSB 0  
LB 1.00 Hz  
GB 0  
PC 1.00

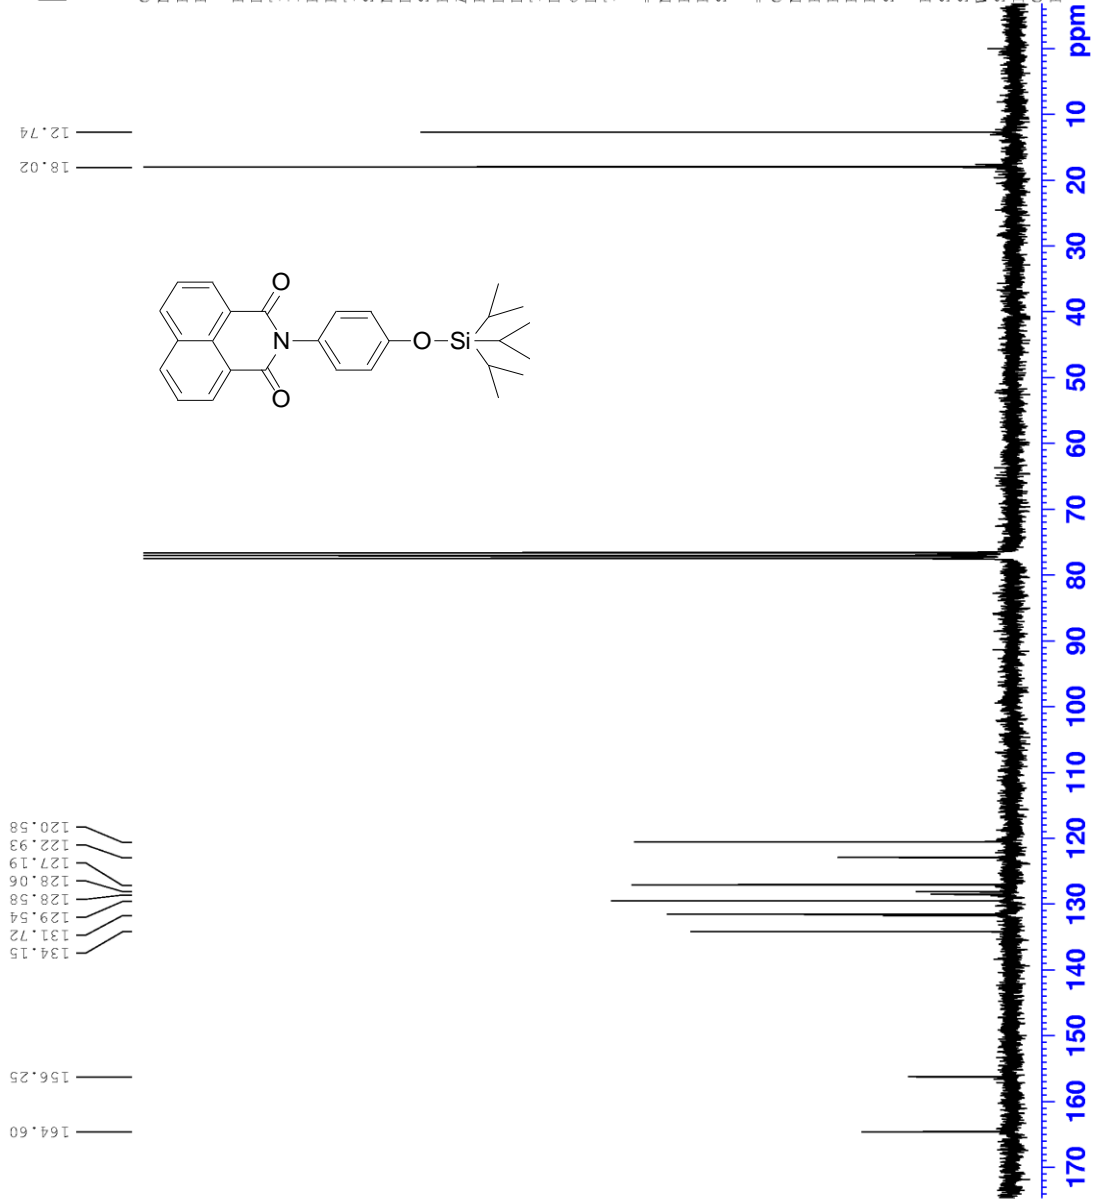

HRMS ES-1

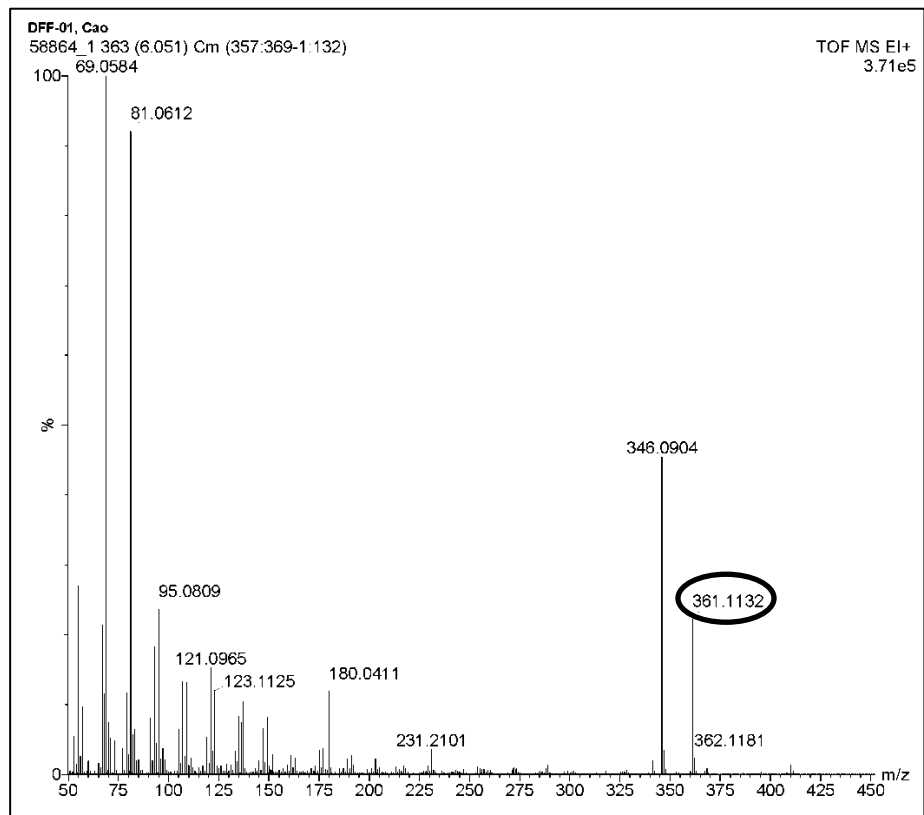

HRMS ES-2

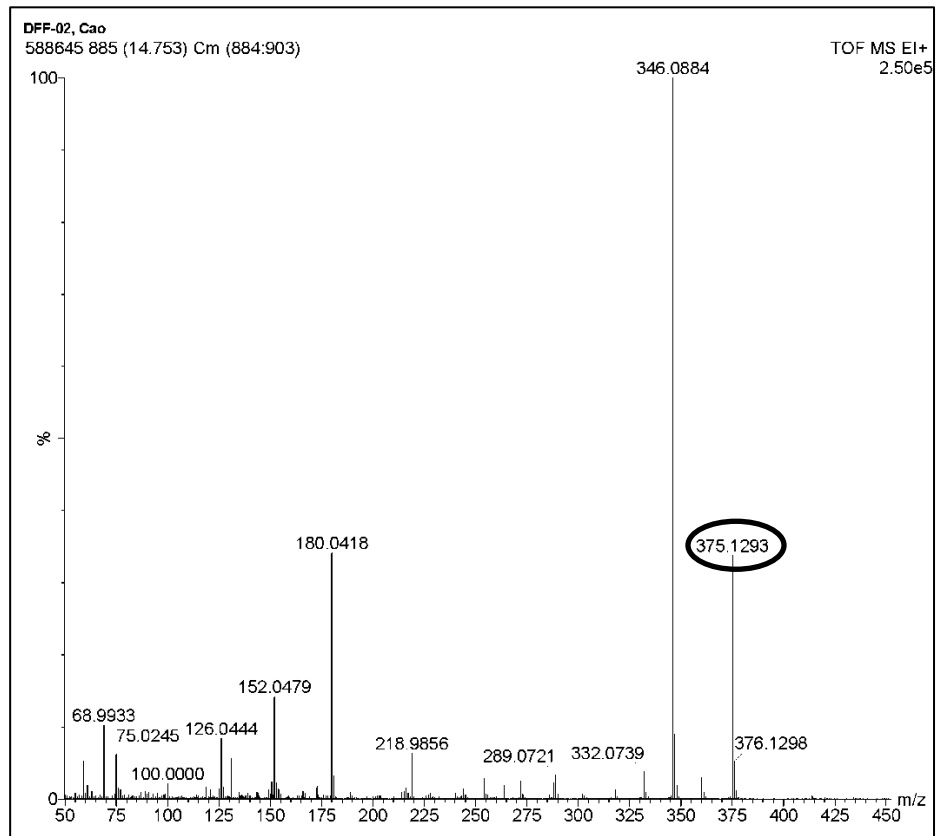

HRMS ES-3

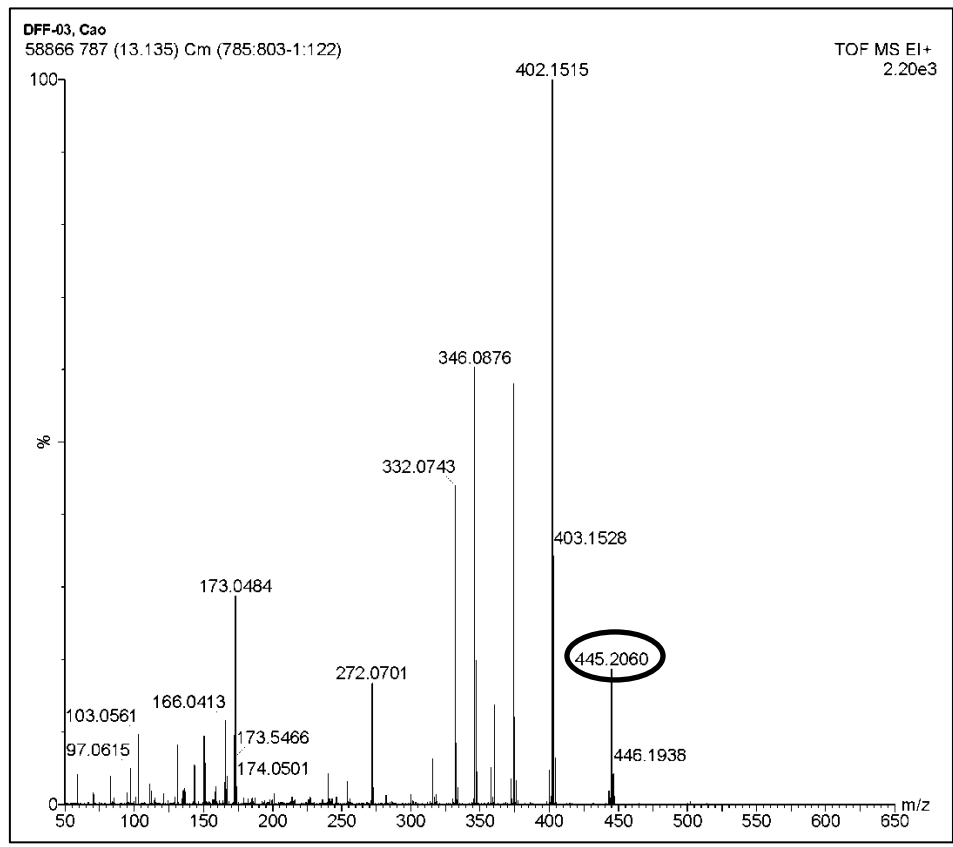

Supplement: c4an00522h1.pdf [file c4an00522h1.pdf]
